# Supplementary material
Source: PubMed Central journal article supplement (PMC4245372)
Supplement: NIHMS618505-supplement-Supp_ApppendixTableS1.pdf [file NIHMS618505-supplement-Supp_ApppendixTableS1.pdf]

**Appendix Table 1. Characteristics of patients with HCV-HBV co-infection separated by receipt of serum HBV DNA test**

| Characteristics (%) | Received HBV DNA test (n=677) | No HBV DNA test (n=693) | P-value |
|---------------------|-------------------------------|-------------------------|---------|
| Age (years)         |                               |                         | 0.11    |
| ≤ 40-49             | 57.3                          | 62.9                    |         |
| 50-59               | 37.4                          | 32.5                    |         |
| ≥ 60                | 5.3                           | 4.6                     |         |
| Gender              |                               |                         | 0.64    |
| Female              | 1.9                           | 1.6                     |         |
| Male                | 98.1                          | 98.4                    |         |
| Race/Ethnicity      |                               |                         | 0.43    |
| Caucasian           | 55.4                          | 51.2                    |         |
| African-American    | 34.4                          | 36.7                    |         |
| Other               | 3.8                           | 4.5                     |         |
| Missing             | 6.4                           | 7.7                     |         |
| HIV                 | 13.6                          | 10.8                    | 0.12    |
| Antiviral Treatment | 36.9                          | 15.2                    | <0.0001 |
| Alcohol abuse       | 48.9                          | 55.3                    | 0.02    |
| Drug abuse          | 45.6                          | 53.4                    | 0.004   |
| Deyo Score          |                               |                         | 0.24    |
| 0                   | 74.6                          | 71.3                    |         |
| 1                   | 15.2                          | 18.6                    |         |
| 2+                  | 10.2                          | 10.1                    |         |
| Cirrhosis           | 27.5                          | 18.2                    | <0.0001 |
